# Supplementary material for: Bacille Calmette–Guérin vaccine reprograms human neonatal lipid metabolism in vivo and in vitro
Source: PubMed Central journal article supplement — Cell Rep. Author manuscript; Available in PMC 2022 Jun 1. (PMC9157458; doi:10.1016/j.celrep.2022.110772), 2022-05-03
Supplement: NIHMS1804982-supplement-1.pdf [file NIHMS1804982-supplement-1.pdf]

**Supplemental information**

**Bacille Calmette-Guérin vaccine reprograms human  
neonatal lipid metabolism *in vivo* and *in vitro***

**Joann Diray-Arce, Asimena Angelidou, Kristoffer Jarlov Jensen, Maria Giulia Conti, Rachel S. Kelly, Matthew A. Pettengill, Mark Liu, Simon D. van Haren, Scott D. McCulloch, Greg Michelloti, Olubukola Idoko, EPIC Consortium, Tobias R. Kollmann, Beate Kampmann, Hanno Steen, Al Ozonoff, Jessica Lasky-Su, Christine S. Benn, and Ofer Levy**

## **Supplemental Information.**

### **Bacille Calmette-Guérin vaccine reprograms human neonatal lipid metabolism *in vivo and in vitro***

Joann Diray-Arce, Asimena Angelidou, Kristoffer Jarlov Jensen, Maria Giulia Conti, Rachel S. Kelly, Matthew A. Pettengill, Mark Liu, Simon D. van Haren, Scott McCulloch, Greg Michelloti, Olubukola Idoko, the EPIC Consortium, Tobias Kollmann, Beate Kampmann, Hanno Steen, Al Ozonoff, Jessica Lasky- Su, Christine Stabell Benn, Ofer Levy

## A *In vivo* Guinea Bissau sampling procedures

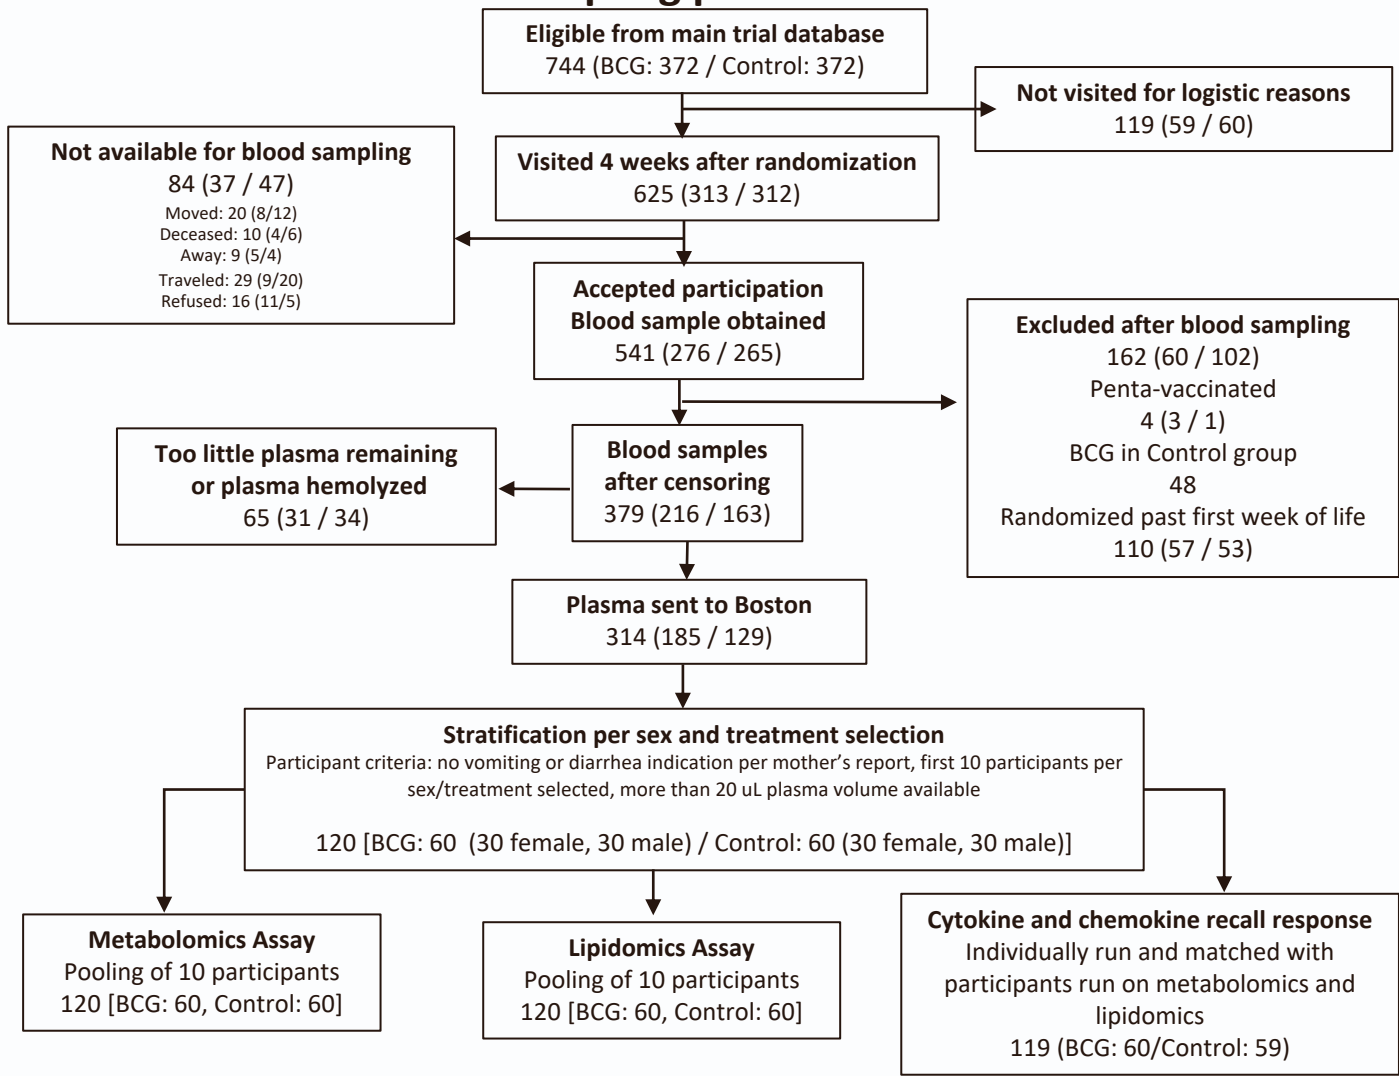

## B *In vitro* Boston sampling procedures

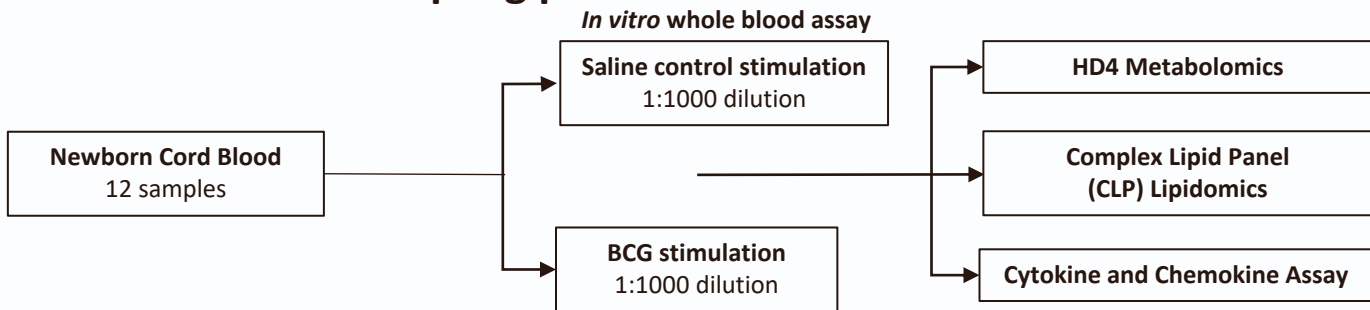

## C Validation Gambia sampling procedures

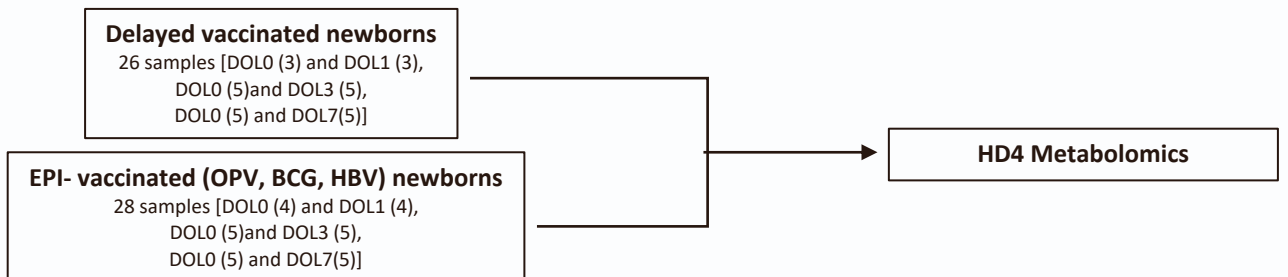

Figure S1. Flow chart of individuals with plasma samples analyzed in the study. Related to Figure 1.

**Figure S1. Flow chart of individuals with plasma samples analyzed in the study. Related to Figure 1.**

- A. Low birth weight newborns in Guinea Bissau were randomized to receive BCG at birth (early BCG) or delayed by 6 weeks (delayed BCG). In an immunological study nested within the trial, capillary blood samples were collected four weeks after randomization to assess the effect of BCG on *in vitro* antigen-induced recall cytokine responses. After the primary analyses (Jensen et al., 2015), remaining plasma samples of sufficient volume were utilized for subsequent metabolomic and lipidomic assays.
- B. Human newborn cord blood samples (n= 12) were collected from healthy term newborns ( $\geq 37$  weeks gestation) for *in vitro* stimulation with vehicle (saline) or BCG. The plasma samples were processed for metabolomics, complex lipid panel lipidomics, and multiplex cytokine/chemokine assays.
- C. Newborns were recruited in The Gambia (West Africa). Each newborn provided a peripheral blood sample at the day of birth (DOL0) and subsets of newborns, each providing a second peripheral blood sample at either DOL1, 3, or 7. The newborns were assigned to either delayed-vaccinated up to 1 week (participant n= 13, total samples n=26) or EPI-vaccinated at birth (participant n=14, total samples n=28). Newborn peripheral venous blood was drawn directly into heparinized collection tubes and subjected to metabolomic assay.

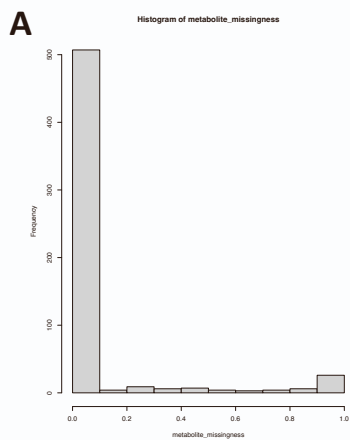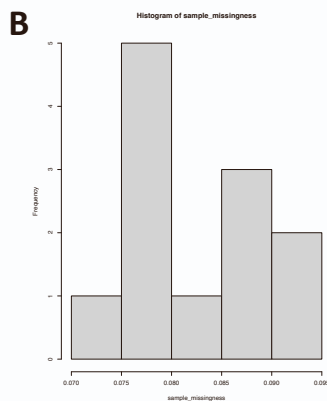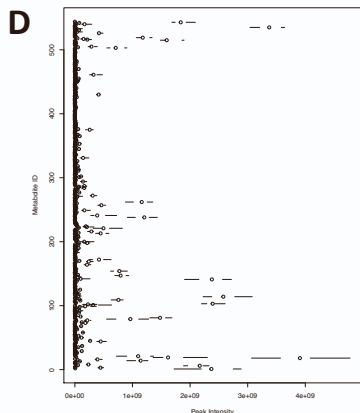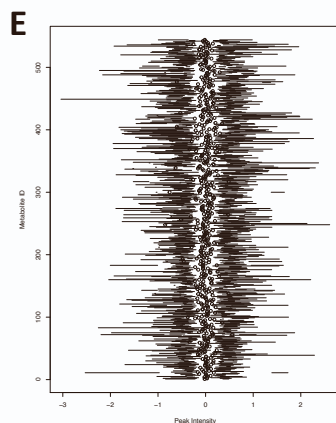

**C** Quality control/assurance summary for *in vivo* Guinea-Bissau cohort

|                                                                |     |
|----------------------------------------------------------------|-----|
| # Metabolites detected                                         | 674 |
| # Metabolites with missing values                              | 23  |
| # Metabolites with IQR=0                                       | 9   |
| # Metabolites passed QC/QA                                     | 642 |
| # Xenobiotic metabolites                                       | 98  |
| # Metabolites included in analysis (after xenobiotics removal) | 544 |

| Guinea-Bissau <i>in vivo</i> cohort | % missing values per metabolite | % missing values per sample |
|-------------------------------------|---------------------------------|-----------------------------|
| Min                                 | 0                               | 0.07292                     |
| 1st Quartile                        | 0                               | 0.07812                     |
| Median                              | 0                               | 0.0816                      |
| Mean                                | 0.08261                         | 0.0261                      |
| 3rd Quartile                        | 0                               | 0.08724                     |
| Max                                 | 1                               | 0.09201                     |

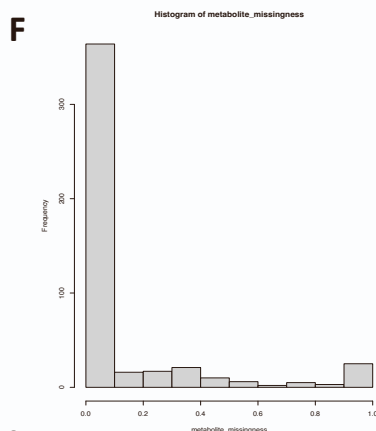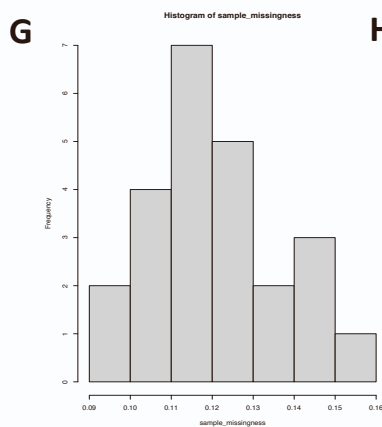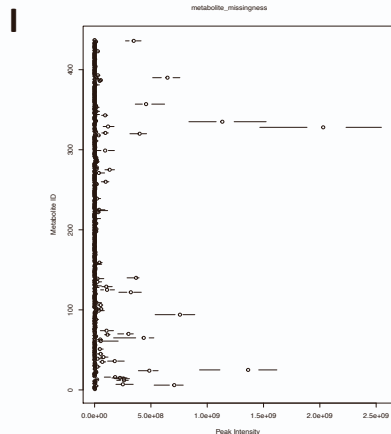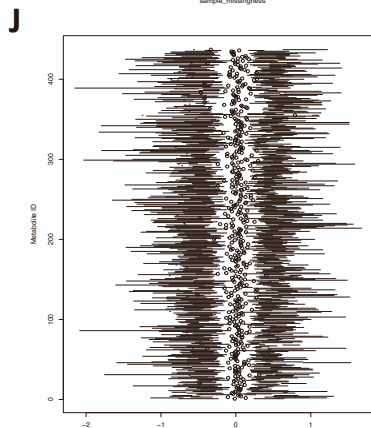

**H** Quality control/assurance summary for Boston *in vitro*

|                                                                |     |
|----------------------------------------------------------------|-----|
| # Metabolites detected                                         | 568 |
| # Metabolites with missing values                              | 17  |
| # Metabolites with IQR=0                                       | 15  |
| # Metabolites passed QC/QA                                     | 536 |
| # Xenobiotic metabolites                                       | 99  |
| # Metabolites included in analysis (after xenobiotics removal) | 437 |

| Boston <i>in vitro</i> cohort | % missing values per metabolite | % missing values per sample |
|-------------------------------|---------------------------------|-----------------------------|
| Min                           | 0                               | 0.09382                     |
| 1st Quartile                  | 0                               | 0.1194                      |
| Median                        | 0                               | 0.1194                      |
| Mean                          | 0.11976                         | 0.11976                     |
| 3rd Quartile                  | 0.08333                         | 0.1274                      |
| Max                           | 1                               | 0.15139                     |

**Figure S2: Summary of quality control and assurance method for metabolomics Guinea-Bissau (*in vivo*, upper panel) and Boston (*in vitro*, lower panel) datasets. Related to Figure 2.**

**Figure S2: Summary of quality control and assurance method for metabolomics Guinea-Bissau (in vivo, upper panel) and Boston (in vitro, lower panel) datasets. Related to Figure 2.**

A and F. Histogram of the proportion of missing values for each metabolite

B and G. Histogram of the proportion of missing values for each sample

C and H. Quality control and assurance metrics summary table.

D and I. Pre-processing distribution before scaling and normalization.

E and J. Post-processing distribution after scaling and normalization.

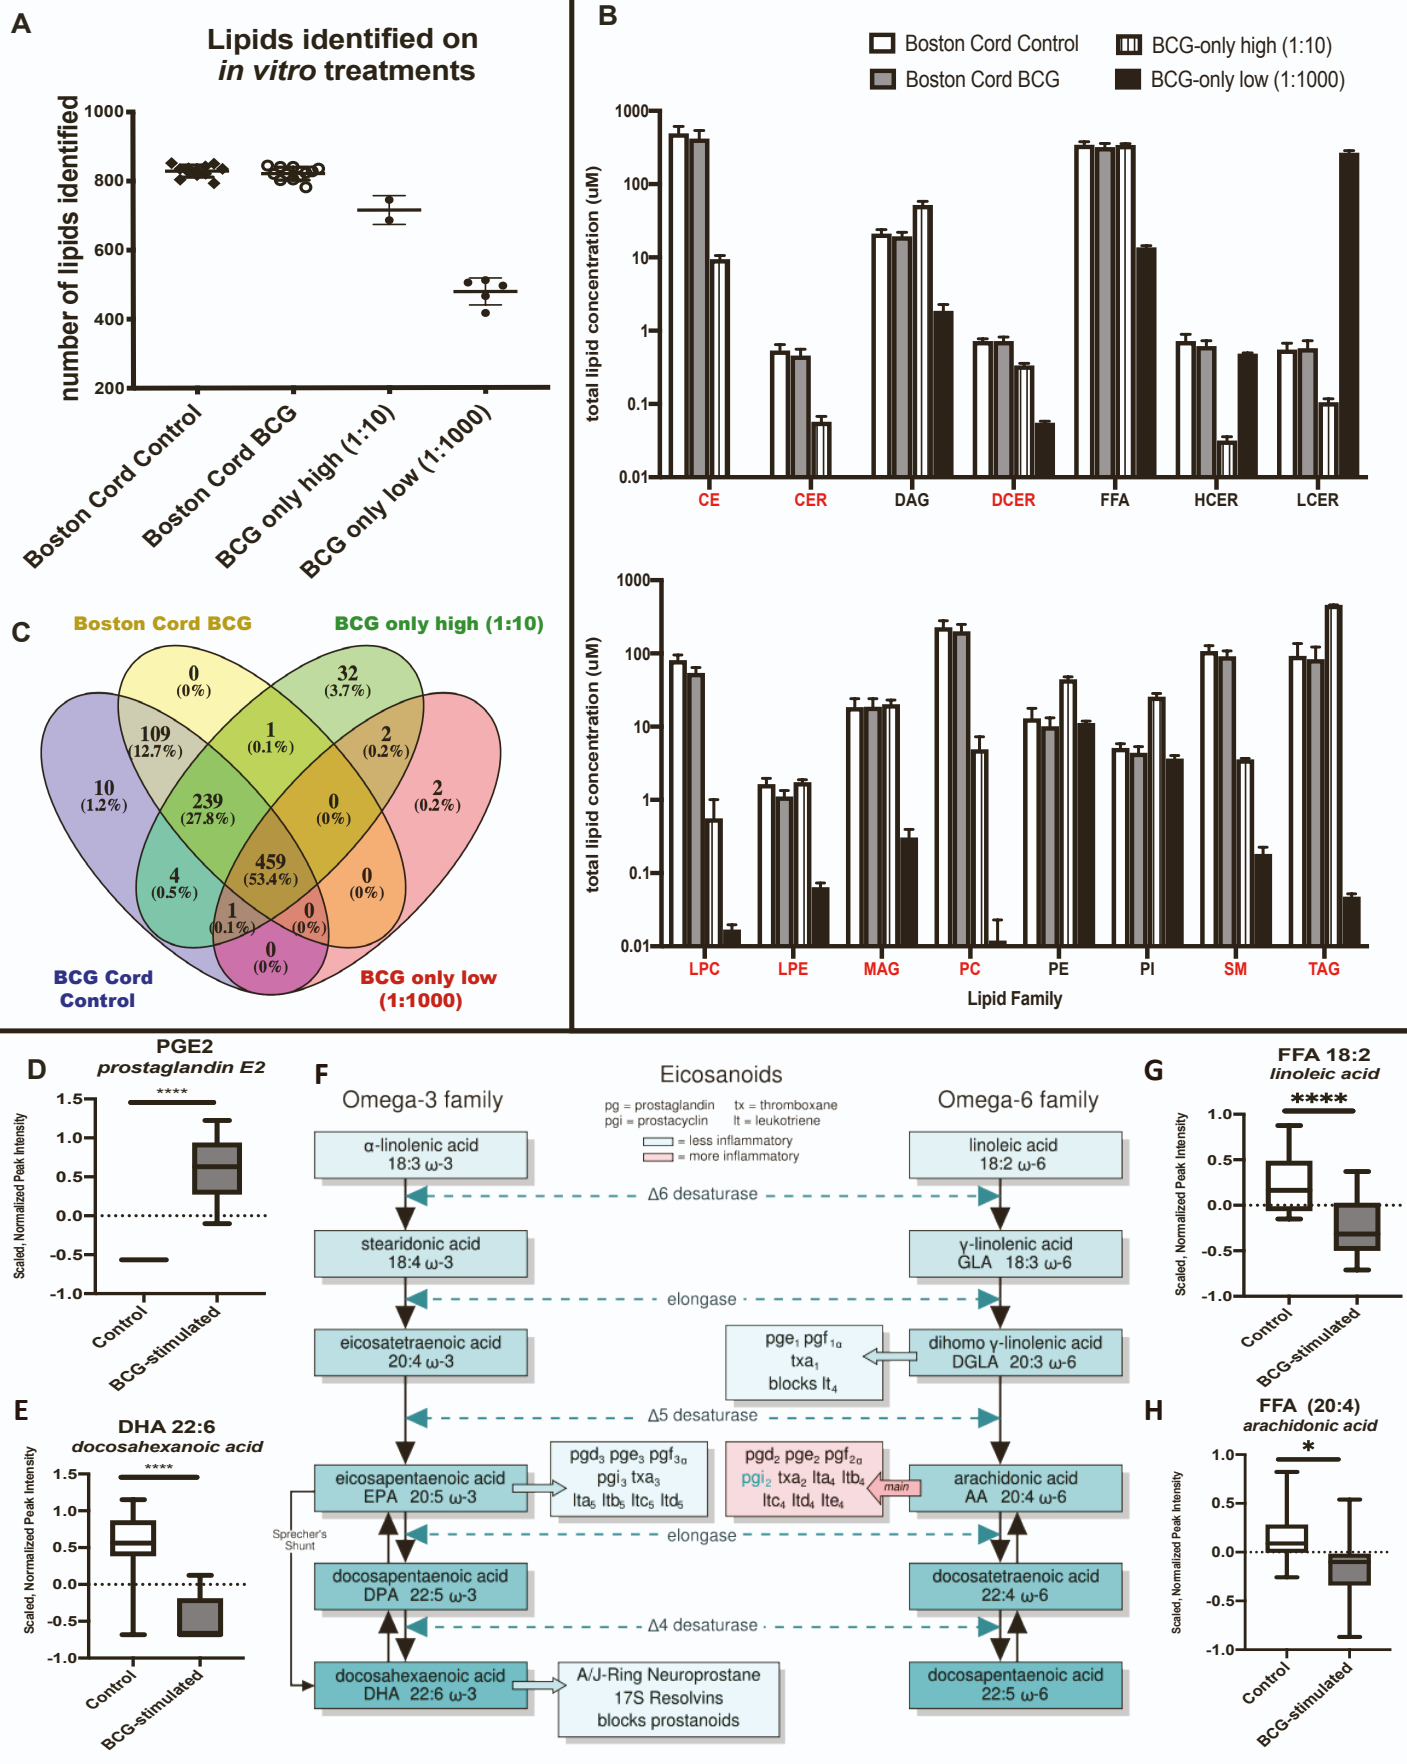

**Figure S3: Addition of BCG to human newborn cord blood *in vitro* perturbs the eicosanoid lipid pathway. Related to Figure 4.**

**Figure S3: Addition of BCG to human newborn cord blood *in vitro* perturbs the eicosanoid lipid pathway. Related to Figure 4.**

A. Heparinized human cord blood was stimulated with saline control or BCG vaccine for 18 hr after which the extracellular medium was collected and analyzed via complex lipid panel lipidomics. BCG alone was tested at high (1:10 v/v) and low (1:1000v/v) concentrations as controls. For *in vitro* studies, the 1:1000 vol/vol ratio was used. A summary of the number of lipids quantified is illustrated. Data are presented as mean  $\pm$  SEM.

B. Comparison of lipid families showed that BCG-only controls (BCG vaccine alone) have lower measured lipids in most families than cord blood stimulated with vehicle or BCG. For *in vitro* treatments, BCG low (1:1000 vol/vol) concentration was used to stimulate cord blood. Lipid families with very low or undetectable concentrations after BCG-only low or BCG cord stimulation (1:1000 vol/vol) are depicted in red.

C. The Venn diagram of detected lipids illustrates that BCG-only controls had fewer lipids detected than *in vitro* control- or BCG-stimulated cord blood samples.

D-H. BCG-induced differentially abundant lipids (DALs) included fatty acid components such as prostaglandin E<sub>2</sub> (PGE<sub>2</sub>) (panel D), docosahexaenoic acid (DHA 22:6) (panel E), linoleic acid (FFA 18:2) (panel G), and arachidonic acid (FFA 20:4) (panel H) suggesting BCG modulates lipid mediators of inflammation (panel F). BCG induced a pro-inflammatory eicosanoid pathway pattern *in vitro*, decreasing anti-inflammatory DHA 22:6, FFA 18:2, and FFA 20:4 while increasing pro-inflammatory PGE<sub>2</sub>. Statistical analyses employed repeated measures t-test for participant samples. Data are presented with box and whiskers depicting quartiles and variability outside the quartiles.



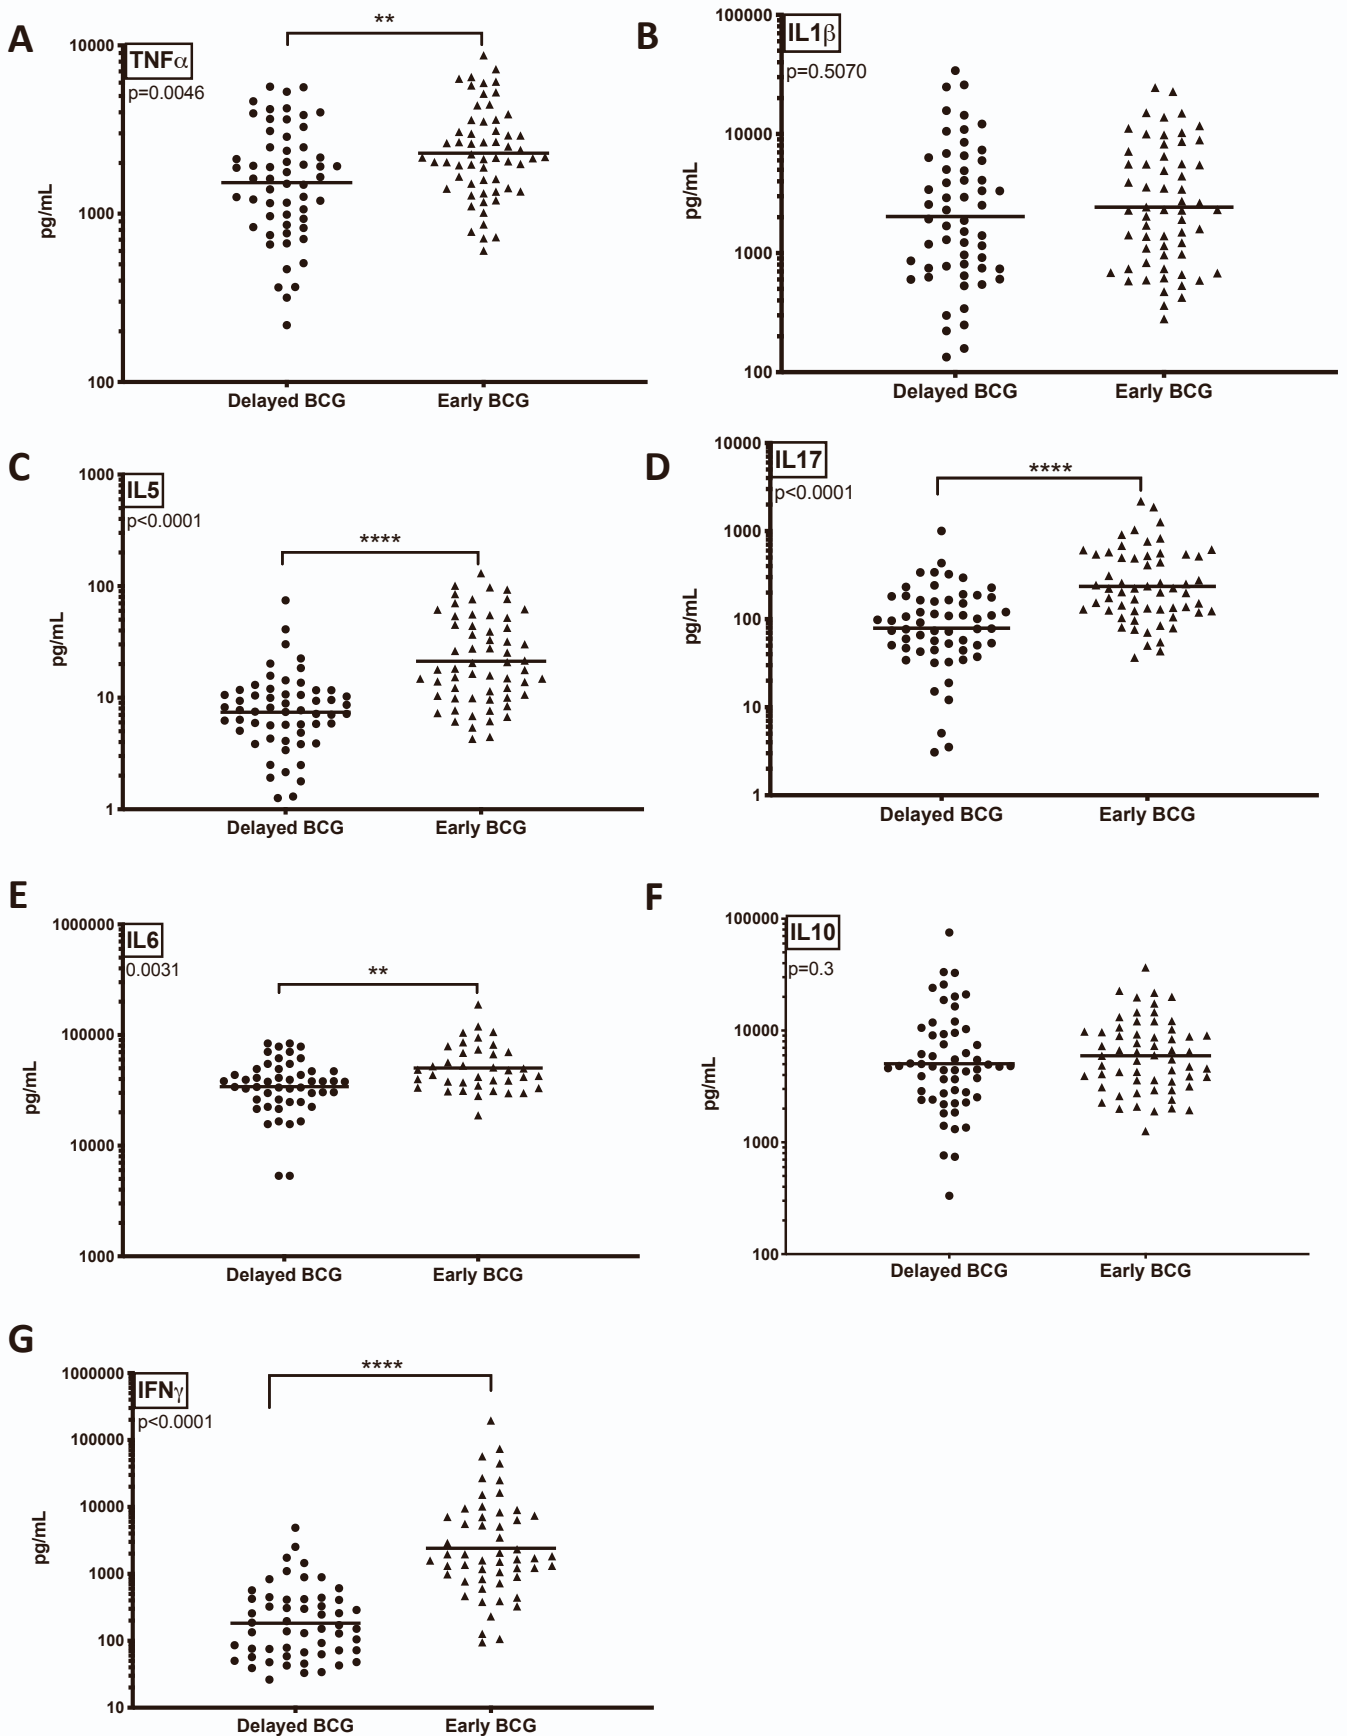

**Figure S4: Early BCG group demonstrated enhanced cytokine production upon PPD re-stimulation of heparinized blood collected 4 weeks post BCG vaccination. Related to Figure 6 and Table S6.**

**Figure S4: Early BCG group demonstrated enhanced cytokine production upon PPD re-stimulation of heparinized blood collected 4 weeks post BCG vaccination. Related to Figure 6 and Table S6.**

A-G. PPD-induced cytokines were compared in the early vs. delayed BCG groups. The early BCG group demonstrated significantly greater PPD-induced production of  $\text{TNF}\alpha$ , IL5, IL6, IL17, and  $\text{IFN}\gamma$ . Groups were compared using the Wilcoxon Rank Sum Test. Data are depicted as geometric means. \*  $P < 0.05$ ; \*\*  $P < 0.01$ ; \*\*\*  $P < 0.001$

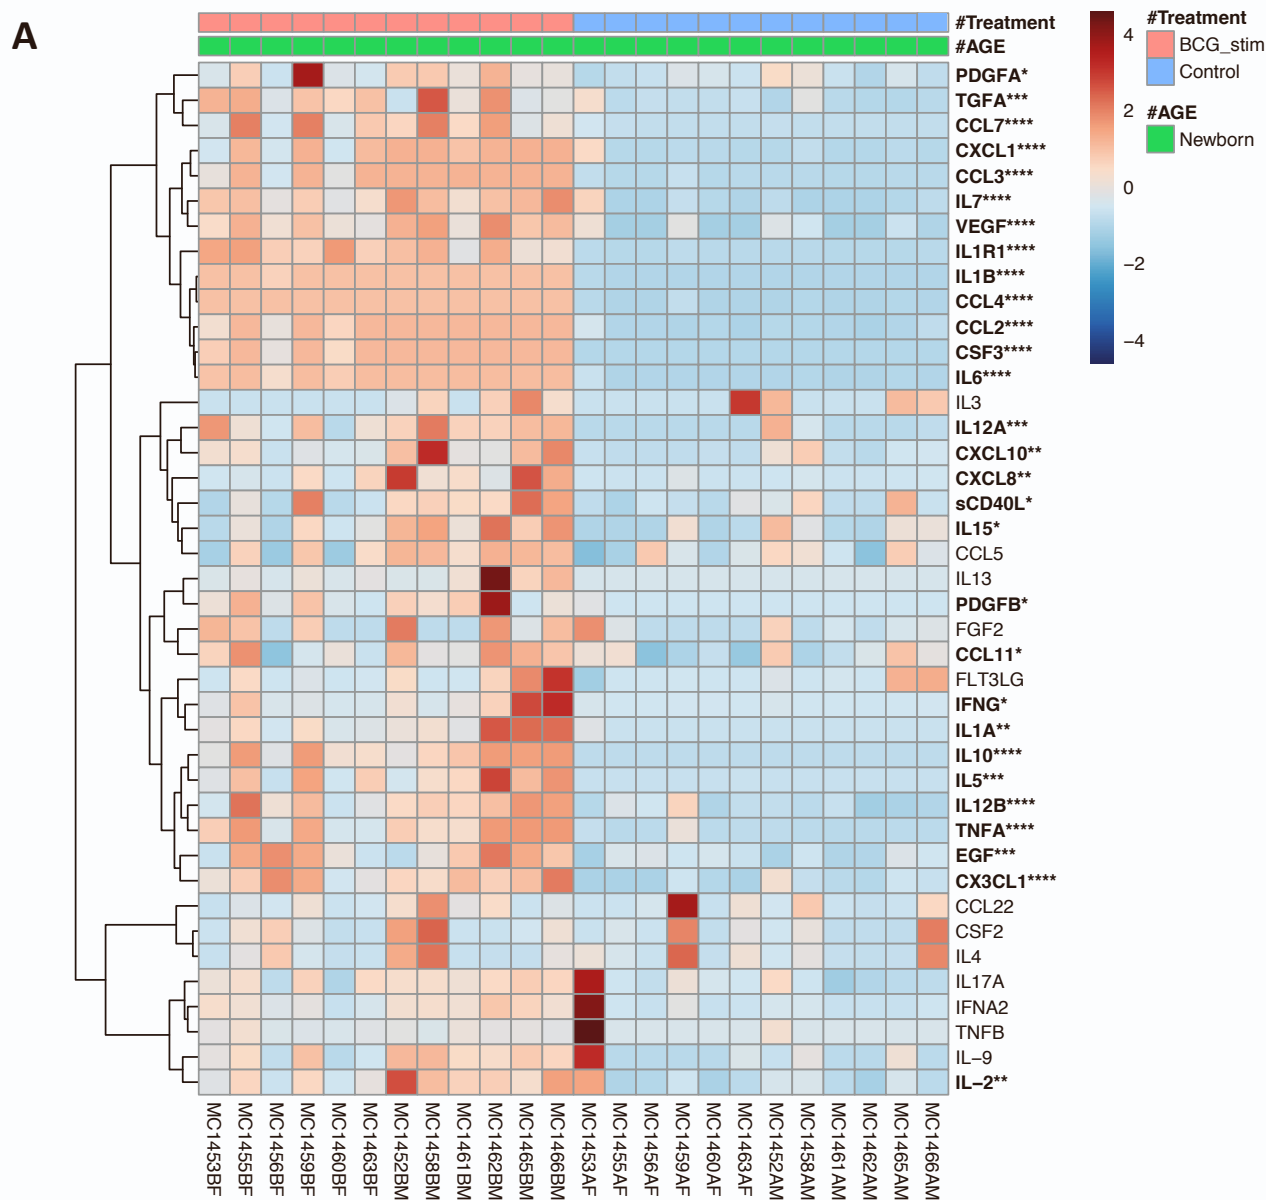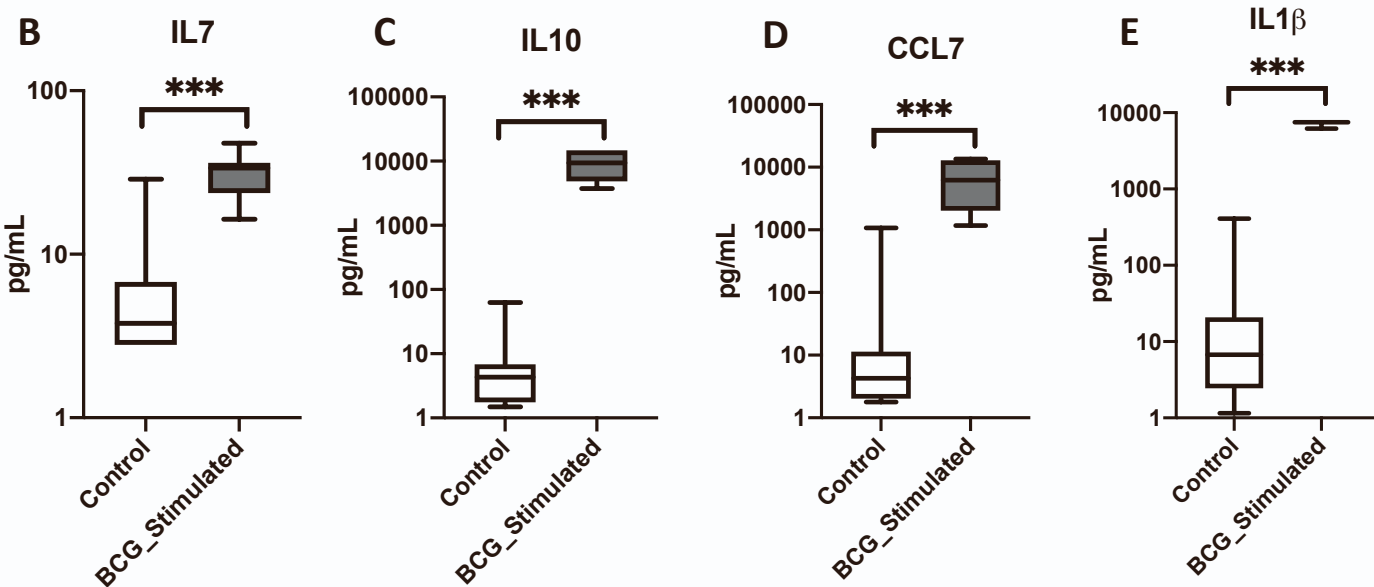

**Figure S5: BCG-induced cytokine and chemokine production in Boston human newborn cord blood *in vitro*. Related to Figure 1.**

**Figure S5: BCG-induced cytokine and chemokine production in Boston human newborn cord blood *in vitro*. Related to Figure 1.**

A. Heatmap depicting changes in the production of 41 selected cytokines and chemokines after BCG *in vitro* stimulation for 18 hr. Two-sample t-tests with Benjamini, Krieger and Yekutieli correction comparing BCG-stimulated vs. vehicle control \*  $P < 0.05$ ; \*\*  $P < 0.01$ ; \*\*\*  $P < 0.001$ . Data are reported using Euclidean distance and Ward algorithm.

B-E. Selected inflammatory cytokines showed differences between vehicle control stimulated cord blood vs. BCG-stimulated cord blood. Paired student t-test used for data analysis \*  $P < 0.05$ ; \*\*  $P < 0.01$ ; \*\*\*  $P < 0.001$ .
